# Supplementary material for: A New<em> Pseudomonas aeruginosa </em>Isolate Enhances Its Unusual 1,3-propanediol Generation from Glycerol in Bioelectrochemical System
Source: Preprints.org preprint supplement (doi:10.20944/preprints202306.2049.v1), 2023-06-28
Supplement: Supplementary file 1 [file supplementary]

# **A new *Pseudomonas aeruginosa* isolate enhances its unusual 1,3-propanediol generation from glycerol in bioelectrochemical system**

Julia Pereira Narcizo<sup>a</sup>, Lucca Bonjy Kikuti Mancilio<sup>b,c</sup>, Matheus Pedrino<sup>b</sup>, María-Eugenia Guazzaroni<sup>b\*</sup>, Adalgisa Rodrigues de Andrade<sup>a</sup>, Valeria Reginatto<sup>a</sup>

<sup>a</sup>Department of Chemistry, Faculty of Philosophy, Sciences and Letters of Ribeirão Preto (FFCLRP) - University of São Paulo (USP) - Ribeirão Preto, SP, Brazil

<sup>b</sup>Department of Biology, Faculty of Philosophy, Sciences and Letters of Ribeirão Preto (FFCLRP) - University of São Paulo (USP) - Ribeirão Preto, SP, Brazil.

<sup>c</sup>Department of Microbiology, University of Massachusetts – Amherst, Massachusetts, USA.

\*Correspondence to:                   María-Eugenia Guazzaroni, [meguazzaroni@ffclrp.usp.br](mailto:meguazzaroni@ffclrp.usp.br)

## **Supplementary Materials**

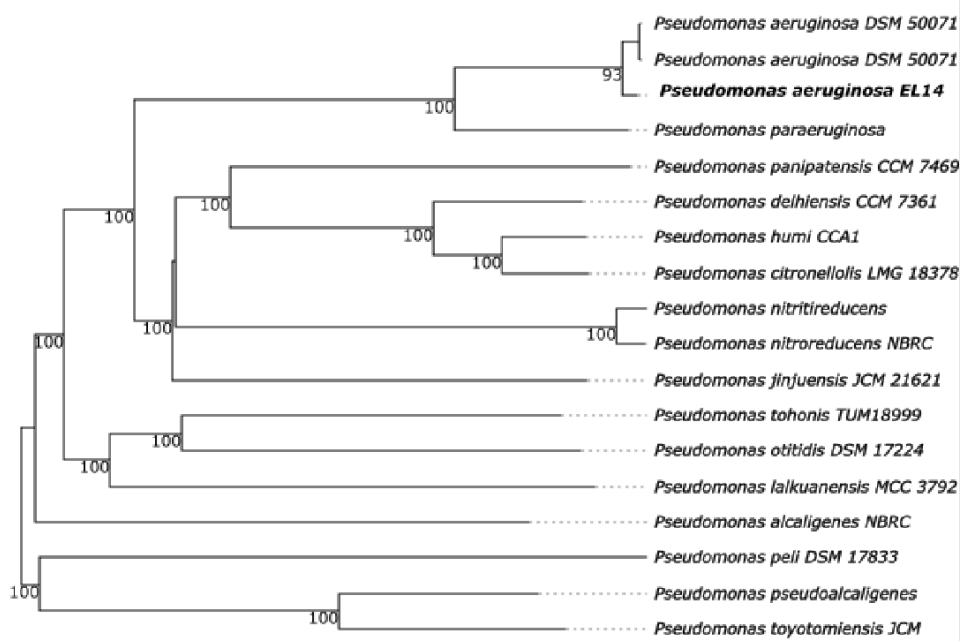

**Figure S1.** Taxonomic affiliation of strain EL14 inferred with TYGS (FastME 2.1.6.1) (Lefor and Gascuel, 2015) from GBDP (Genome Blast Distance Phylogeny) distances calculated from strain EL14 genome. The branch lengths are scaled in terms of GBDP distance formula d5. The numbers above branches are GBDP pseudo-bootstrap support values > 60 % from 100 replications, with an average branch support of 95.5 %. The tree was rooted at the midpoint.
